# Supplementary material
Source: PubMed Central journal article supplement (PMC8454267)
Supplement: NIHMS1608160-supplement-213_2020_5575_MOESM1_ESM.pdf [file NIHMS1608160-supplement-213_2020_5575_MOESM1_ESM.pdf]

**Supplementary Table 1. Non-Significant Effects**

| <b>Phase x Housing (pair vs single) x Age (adol vs adult)</b> | <b>EXP 1 (Fig 2)</b>       |                           | <b>EXP 2 (Fig 3)</b>       |                           | <b>EXP 3 (Fig 5)</b>      |
|---------------------------------------------------------------|----------------------------|---------------------------|----------------------------|---------------------------|---------------------------|
| Coc-SA Day x Housing x Age, Active lever                      | F(9, 270) = 0.572, p=0.820 |                           | F(9, 243) = 0.397, p=0.936 |                           | -                         |
| Coc-SA Day x Housing, Active lever                            | F(9, 270) = 1.658, p=0.099 |                           | F(9, 243) = 0.327, p=0.965 |                           | -                         |
| Coc-SA Day x Age, Active lever                                | F(9, 270) = 0.660, p=0.745 |                           | F(9, 243) = 0.492, p=0.879 |                           | -                         |
| EXT Day x Housing x Age, Active lever                         | F(7, 210) = 0.840, p=0.555 |                           | F(7, 189) = 0.940, p=0.477 |                           | -                         |
| EXT Day x Housing, Active lever                               | F(7, 210) = 2.696, p=0.011 |                           | F(7, 189) = 0.181, p=0.989 |                           | -                         |
| EXT Day x Age, Active lever                                   | F(7, 210) = 0.886, p=0.518 |                           | F(7, 189) = 2.854, p=0.007 |                           | -                         |
| Context x Housing x Age, Active lever                         | F(1, 30) = 0.304, p=0.585  |                           | F(1, 27) = 2.228, p=0.147  |                           | -                         |
| Context x Housing, Active lever                               | F(1, 30) = 9.889, p=0.004  |                           | F(1, 27) = 0.485, p=0.492  |                           | -                         |
| Context x Age, Active lever                                   | F(1, 30) = 1.929, p=0.175  |                           | F(1, 27) = 1.997, p=0.169  |                           | -                         |
| <b>Pre Existing Differences: pair vs single</b>               | <b>EXP 1</b>               |                           | <b>EXP 2</b>               |                           | <b>EXP 3</b>              |
|                                                               | <b>Adol</b>                | <b>Adult</b>              | <b>Adol</b>                | <b>Adult</b>              | <b>Adol</b>               |
| Sessions to acquire Coc-SA                                    | t(18) = -0.313, p=0.758    | t(12) = 1.759, p=0.104    | t(13) = 0.819, p=0.428     | t(14)=0.483, p=0.636      | F(12) = 1.469, p=0.249    |
| Infusions, Avg Coc-SA, last 3 sessions                        | t(18) = 0.252, p=0.804     | t(12) = -1.148, p=0.273   | t(13) = 0.906, p=0.381     | t(14)=-0.810, p=0.432     | F(12) = 1.140, p=0.307    |
| Active lever, Avg Coc-SA, last 3 session                      | t(18) = -0.038, p=0.970    | t(12) = -0.395, p=0.700   | t(13) = 0.104, p=0.919     | t(14)=-0.365, p=0.365     | F(12) = 0.754, p=0.402    |
| Inactive lever, Avg Coc-SA, last 3 session                    | t(18) = 0.299, p=0.768     | t(12) = 0.721, p=0.485    | t(13) = 0.124, p=0.903     | t(14)=0.275, p=0.788      | F(12) = 4.338, p=0.060    |
| Active lever, EXT, last session                               | t(18) = -0.158, p=0.876    | t(12) = -1.138, p=0.278   | t(13) = 0.097, p=0.924     | t(14)=-1.012, p=0.329     | F(12) = 1.12, p=0.311     |
| Inactive lever, EXT, last session                             | t(18) = 1.852, p=0.081     | t(12) = 0.963, p=0.354    | t(13) = 1.131, p=0.279     | t(14)=-0.654, p=0.524     | F(12) = 0.002, p=0.966    |
| <b>EXT (sessions) x Housing (pair vs single)</b>              | <b>EXP 1</b>               |                           | <b>EXP 2</b>               |                           |                           |
|                                                               | <b>Adol</b>                | <b>Adult</b>              | <b>Adol</b>                | <b>Adult</b>              |                           |
| Active lever, EXT session x Housing interaction               | F(7, 18) = 1.212, p=0.301  | N/A                       | F(7, 13)= 0.744, p=0.635   | F(7, 14)=0.420, p=0.888   | -                         |
| Active lever, Housing main                                    | F(1, 18) = 0.256, p=0.619  | F(1, 12)=1.074, p=0.320   | F(13)=0.022, p=0.884       | F(1, 14)=0.209, p=0.654   | -                         |
| Inactive lever, EXT session x Housing interaction             | F(7, 18) = 0.508, p=0.827  | N/A                       | F(7, 13)= 1.431, p=0.203   | F(7, 14)=0.556, p=0.790   | -                         |
| Inactive lever, Housing main                                  | F(1, 18) = 2.085, p=0.166  | F(1, 12)=0.003, p=0.960   | F(13)=0.360, p=0.559       | F(1, 14)=0.706, p=0.415   | -                         |
| <b>Context (EXT S8 vs Test) x Housing (pair vs single)</b>    | <b>EXP 1</b>               |                           | <b>EXP 2</b>               |                           | <b>EXP 3</b>              |
|                                                               | <b>Adol</b>                | <b>Adult</b>              | <b>Adol</b>                | <b>Adult</b>              |                           |
| Active lever, Context x Housing interaction                   | N/A                        | N/A                       | F(1, 13) = 0.259, p=0.620  | F(1, 14)=2.995, p=0.106   | N/A                       |
| Active lever, Housing main                                    | N/A                        | N/A                       | F(1, 13) = 0.201, p=0.662  | F(1, 14)=1.566, p=0.231   | N/A                       |
| Inactive lever, Context x Housing interaction                 | F(1, 18) = 2.111, p=0.163  | F(1, 12)=0.599, p=0.454   | F(1, 13) = 0.095, p=0.763  | F(1, 14)=0.655, p=0.432   | F(1, 12) = 0.202, p=0.661 |
| Inactive lever, Context main                                  | N/A                        | N/A                       | N/A                        | N/A                       | N/A                       |
| Inactive lever, Housing main                                  | N/A                        | F(1, 12)=0.189, p=0.671   | F(1, 13) = 0.273, p=0.610  | F(1, 14)=0.885, p=0.363   | F(1, 12) = 0.358, p=0.560 |
| <b>Test Bins (10 min) x Housing (pair vs single)</b>          | <b>EXP 1</b>               |                           | <b>EXP 2</b>               |                           |                           |
|                                                               | <b>Adol</b>                | <b>Adult</b>              | <b>Adol</b>                | <b>Adult</b>              |                           |
| Active lever, Test Bin x Housing interaction                  | F(5, 18) = 2.217, p=0.059  | N/A                       | F(5, 13) = 0.937, p=0.463  | F(5, 14) = 0.966, p=0.445 | -                         |
| Active lever, Test Bin                                        | N/A                        | N/A                       | N/A                        | N/A                       | -                         |
| Active lever, Housing main                                    | N/A                        | N/A                       | F(1, 13) = 0.236, p=0.635  | F(1, 14) = 2.348, p=0.148 | -                         |
| Inactive lever, Context x Housing interaction                 | F(5, 18) = 1.229, p=0.302  | F(5, 12) = 1.007, p=0.421 | F(5, 13) = 0.045, p=0.999  | F(5, 14) = 0.429, p=0.827 | -                         |
| Inactive lever, Test Bin                                      | N/A                        | N/A                       | N/A                        | N/A                       | -                         |
| Inactive lever, Housing main                                  | N/A                        | F(1, 12) = 0.013, p=0.911 | F(1, 13) = 0.021, p=0.887  | F(1, 14) = 0.840, p=0.375 | -                         |

N/A= not applicable, Significant effect reported in main text
